# Supplementary material
Source: bioRxiv or medRxiv preprint supplement (https://www.biorxiv.org/highwire/filestream/130491/field_highwire_adjunct_files/0/434654-1.pdf)
Supplement: Supplementary file [file 434654-1.pdf]

1

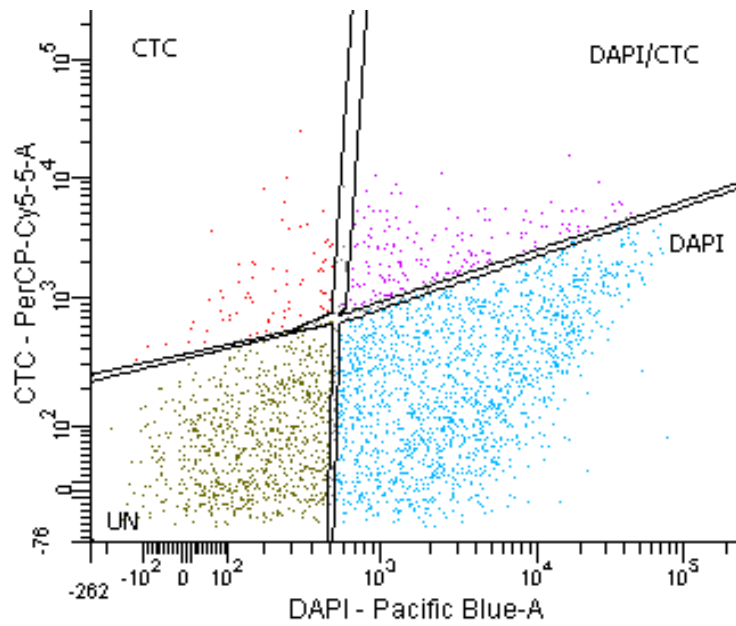

2

3 **Figure S1.** Example of flow cytometry output used for estimating the fraction of  
4 metabolically active and dormant cells in soil. The purple dots in the upper-right panel are  
5 cells that were labeled with both DAPI and CTC and therefore were counted as active cells.  
6 The blue dots in the lower-right panel were cells that were labeled with DAPI but not with  
7 CTC were therefore counted as dormant cells. Considering that CTC needs to be reduced to  
8 the fluorophore CTC-formazan to emit a signal and be detected, and that we only counted  
9 cells that had similar light scattering characteristics to the *Escherichia coli* used as positive  
10 control, we assumed that the red dots in the upper-left panel were also active cells that may  
11 have needed more time to incorporate DAPI.
